# Supplementary material
Source: Springer Nature journal article supplement (https://www.springermedizin.de/resource/supplementary/12943_2009_575_MOESM2_ESM.pdf/9555006)

**A**

| Probe Set ID | Gene ID      | Name  | Induction |       | q-value |
|--------------|--------------|-------|-----------|-------|---------|
|              |              |       | CD        | CD+LB |         |
| 1425654_a_at | <i>Lima1</i> | Eplin | 5.21      | 2.43  | 1.14    |
| 1435727_s_at | <i>Lima1</i> | Eplin | 3.98      | 2.38  | 1.99    |
| 1450629_at   | <i>Lima1</i> | Eplin | 3.71      | 2.08  | 0       |
| 1422499_at   | <i>Lima1</i> | Eplin | 3.51      | 2.17  | 0       |

**B**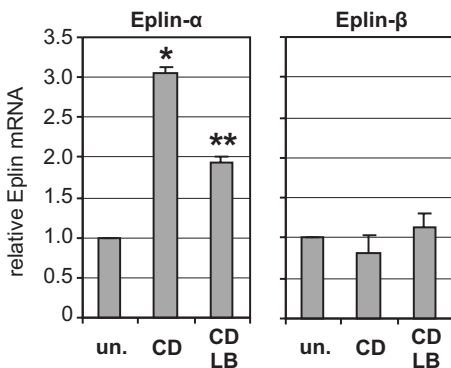**C**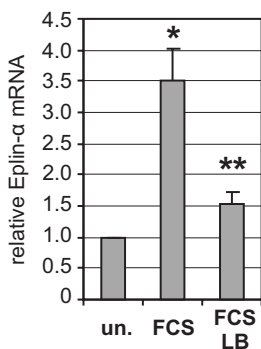**D**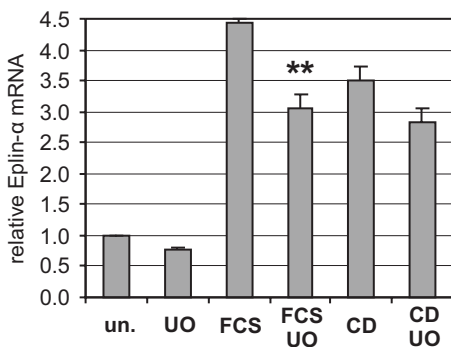

Supplement: MOESM2 [file 9555006]
